# Supplementary material
Source: PubMed Central journal article supplement (PMC1544166)

**A**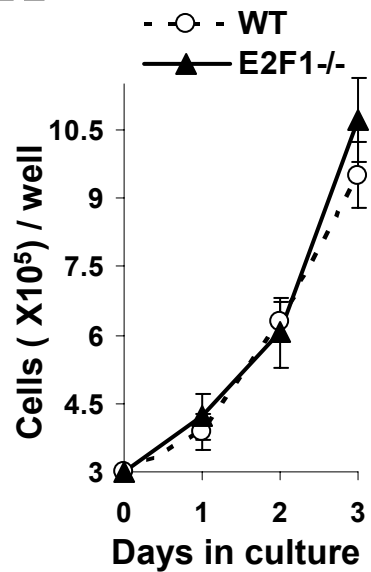**B**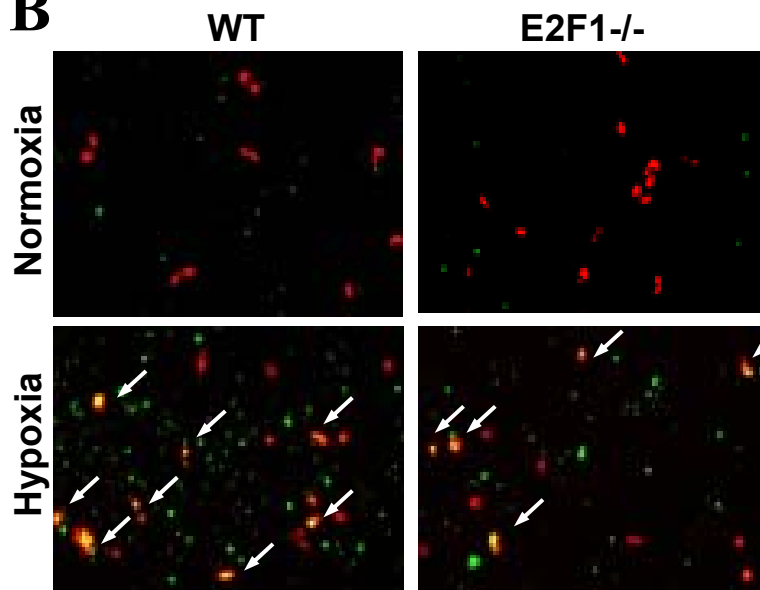**C**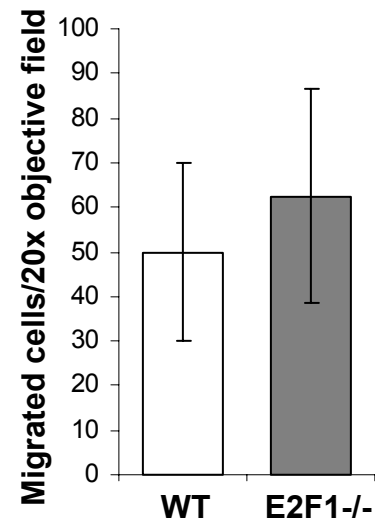**D**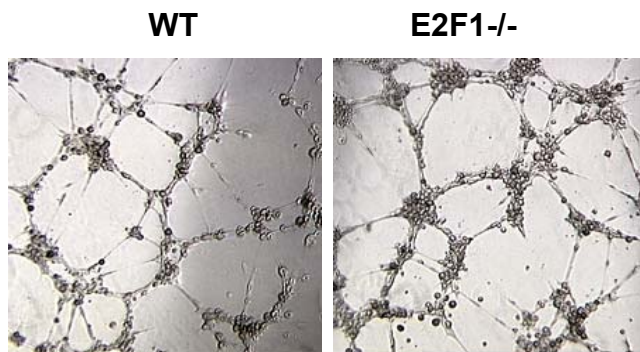**E**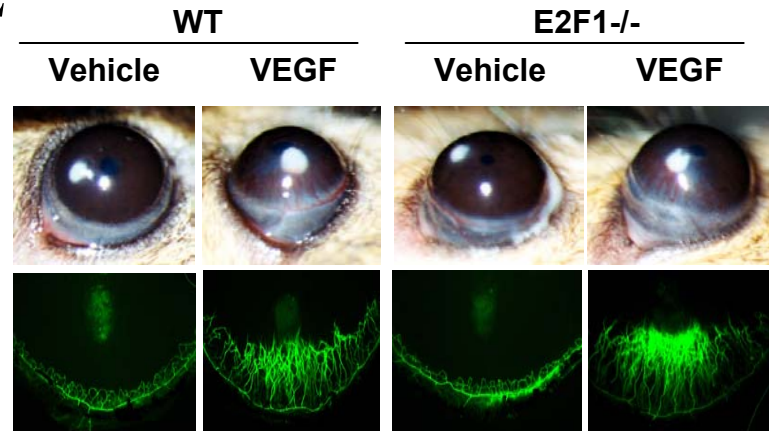

Supplement: pnas_0509533103_1.pdf [file pnas_0509533103_1.pdf]
